# Supplementary material
Source: PubMed Central journal article supplement (PMC11028627)
Supplement: 262_2017_2052_MOESM1_ESM.pdf [file 262_2017_2052_MOESM1_ESM.pdf]

Supplementary Table 1. Clinical characteristics of 36 patients with gastric cancer.

| Variable                                                                      | No. of patients   |
|-------------------------------------------------------------------------------|-------------------|
| Gender (male/female)                                                          | 21/15             |
| Age (years; median, range)                                                    | 57, 32-74         |
| CEA (U/L; <5/≥5)                                                              | 22/14             |
| Tumor size (cm; <5/≥5)                                                        | 23/13             |
| <i>H.pylori</i> antibody (positive vs. negative)                              | 10/26             |
| Histological type (differentiated/undifferentiated)                           | 17/19             |
| Lymphatic invasion (absent/present)                                           | 18/18             |
| Vascular invasion (absent/present)                                            | 13/23             |
| Tumor (T) invasion (T1+T2/T3+T4)                                              | 15/21             |
| Lymphoid Nodal (N) status (N0+N1/N2+N3)                                       | 19/17             |
| Distant metastasis (M) status (M0/M1)                                         | 33/3              |
| TNM stage (I + II / III + IV)                                                 | 16/20             |
| IL-6 production <sup>a</sup> (median, range)                                  | 38.49, 16.4-105.7 |
| IL-6 <sup>+</sup> cell <sup>b</sup> (median, range)                           | 163.5, 64-243     |
| CD163 <sup>+</sup> macrophage <sup>c</sup> (median, range)                    | 34, 8-67          |
| CD163 <sup>+</sup> CD206 <sup>+</sup> macrophage <sup>d</sup> (median, range) | 17, 2-28          |

<sup>a</sup>IL-6 production was the concentration of IL-6 (pg/mg) of tumor tissues by ELISA. <sup>b</sup>IL-6<sup>+</sup> cell was the number of IL-6<sup>+</sup> cell per field of tumor tissues by immunochemistry. <sup>c</sup>CD163<sup>+</sup> macrophage was the number of CD163<sup>+</sup> macrophage per field of tumor tissues by immunochemistry. <sup>d</sup>CD163<sup>+</sup>CD206<sup>+</sup> macrophage was the number of CD163<sup>+</sup>CD206<sup>+</sup> macrophage per field of tumor tissues by immunochemistry. CEA, carcinoembryonic antigen.
